# Supplementary material for: Centrifugal microfluidic platform for single-cell level cardiomyocyte-based drug profiling and screening
Source: Royal Society of Chemistry journal article supplement (doi:10.1039/c5lc00652j), 2015-01-01
Supplement: c5lc00652j12.pdf [file c5lc00652j12.pdf]

| <b>Incubation Time</b><br><b>(h)</b> | <b>Beat Rate</b><br><b>(bpm)</b> | <b>Contraction</b><br><b>(<math>\mu\text{m/s}</math>)</b> | <b>Relaxation</b><br><b>(<math>\mu\text{m/s}</math>)</b> | <b>Deformation</b><br><b>(<math>\mu\text{m}</math>)</b> | <b>Beat Interval</b><br><b>(s)</b> | <b>Beat Duration</b><br><b>(s)</b> |
|--------------------------------------|----------------------------------|-----------------------------------------------------------|----------------------------------------------------------|---------------------------------------------------------|------------------------------------|------------------------------------|
| 4                                    | 8 $\pm$ 2                        | 0.687 $\pm$ 0.121                                         | 0.308 $\pm$ 0.060                                        | 0.298 $\pm$ 0.112                                       | 12.658 $\pm$ 3.766                 | 0.993 $\pm$ 0.072                  |
| 8                                    | 11 $\pm$ 3                       | 0.675 $\pm$ 0.088                                         | 0.258 $\pm$ 0.039                                        | 0.157 $\pm$ 0.025                                       | 14.401 $\pm$ 7.211                 | 0.787 $\pm$ 0.048                  |
| 12                                   | 7 $\pm$ 1                        | 0.724 $\pm$ 0.113                                         | 0.270 $\pm$ 0.036                                        | 0.157 $\pm$ 0.020                                       | 9.269 $\pm$ 1.086                  | 0.831 $\pm$ 0.037                  |
| 16                                   | 7 $\pm$ 2                        | 0.456 $\pm$ 0.059                                         | 0.192 $\pm$ 0.020                                        | 0.097 $\pm$ 0.011                                       | 9.413 $\pm$ 1.942                  | 0.753 $\pm$ 0.040                  |
| 20                                   | 6 $\pm$ 1                        | 1.053 $\pm$ 0.275                                         | 0.503 $\pm$ 0.154                                        | 0.229 $\pm$ 0.074                                       | 23.768 $\pm$ 9.372                 | 0.705 $\pm$ 0.116                  |
| 24                                   | 9 $\pm$ 2                        | 0.691 $\pm$ 0.163                                         | 0.239 $\pm$ 0.057                                        | 0.125 $\pm$ 0.030                                       | 8.767 $\pm$ 3.746                  | 0.628 $\pm$ 0.067                  |
| 48                                   | 14 $\pm$ 3                       | 2.884 $\pm$ 0.364                                         | 1.581 $\pm$ 0.245                                        | 0.583 $\pm$ 0.076                                       | 12.238 $\pm$ 5.350                 | 0.723 $\pm$ 0.038                  |
| 72                                   | 20 $\pm$ 6                       | 2.747 $\pm$ 0.504                                         | 1.748 $\pm$ 0.332                                        | 0.574 $\pm$ 0.103                                       | 4.680 $\pm$ 1.280                  | 0.665 $\pm$ 0.027                  |
| 96                                   | 20 $\pm$ 4                       | 1.895 $\pm$ 0.453                                         | 1.218 $\pm$ 0.319                                        | 0.858 $\pm$ 0.441                                       | 3.746 $\pm$ 1.272                  | 0.749 $\pm$ 0.104                  |
| 120                                  | 18 $\pm$ 7                       | 1.487 $\pm$ 0.426                                         | 0.984 $\pm$ 0.296                                        | 0.334 $\pm$ 0.091                                       | 2.324 $\pm$ 0.574                  | 0.662 $\pm$ 0.110                  |

**Supplementary Table 1.** Summary of generated values based on beat profiles. Standard error is denoted in the table (n=50). Cells were observed every 4 h for 1 day and continued to be monitored for 5 days. Abrupt decrease of beating cells were observed after 5 days.
